# Supplementary material for: Semi-rational design of an imine reductase for asymmetric synthesis of alkylatedS-4-azepanamines
Source: Royal Society of Chemistry journal article supplement (doi:10.1039/d3ob00442b), 2023-01-01
Supplement: d3ob00442b1.pdf [file d3ob00442b1.pdf]

## **Semi-rational design of an imine reductase for asymmetric synthesis of alkylated *S*-4-azepanamines**

Fangfang Zhu<sup>‡a,b</sup>, Jun Zhang<sup>‡\*c</sup>, Yaqing Ma<sup>b</sup>, Lujia Yang<sup>b</sup>, Qiang Gao<sup>\*a</sup>, Shushan Gao<sup>\*b,d</sup>,  
Chengsen Cui<sup>\*b,d</sup>

<sup>a</sup>College of Biotechnology, Tianjin University of Science and Technology, Tianjin 300457, China

<sup>b</sup>Tianjin Institute of Industrial Biotechnology, Chinese Academy of Sciences, Tianjin 300308,  
China

<sup>c</sup>School of Life Science, Hebei University, Baoding 071002, China

<sup>d</sup>National Technology Innovation Center of Synthetic Biology, Tianjin 300308, China

<sup>‡</sup> These authors contributed equally to this work.

|                                                                                                 |           |
|-------------------------------------------------------------------------------------------------|-----------|
| <b>1. General.....</b>                                                                          | <b>1</b>  |
| <b>2. Materials .....</b>                                                                       | <b>1</b>  |
| <b>3. Preparation of racemic amine and chiral amine standards.....</b>                          | <b>1</b>  |
| <b>4. NMR data of amine products.....</b>                                                       | <b>1</b>  |
| <b>5. HPLC and chiral HPLC analysis .....</b>                                                   | <b>3</b>  |
| <b>6. Expression and purification of M5 and variants .....</b>                                  | <b>3</b>  |
| <b>7. Triple code saturation mutagenesis library construction and screening procedure .....</b> | <b>3</b>  |
| <b>8. Site-saturation mutagenesis libraries construction and screening procedure .....</b>      | <b>4</b>  |
| <b>9. Biotransformation for purification enzyme.....</b>                                        | <b>4</b>  |
| <b>10. Molecular docking .....</b>                                                              | <b>5</b>  |
| <b>11. Sequence of IR-G36-M5 and the triple-mutant .....</b>                                    | <b>5</b>  |
| <b>Supplementary Tables .....</b>                                                               | <b>7</b>  |
| <b>Chiral HPLC Chromatograms .....</b>                                                          | <b>10</b> |
| <b>NMR spectra of amine products.....</b>                                                       | <b>14</b> |
| <b>HR-ESI-MS spectra of amine products .....</b>                                                | <b>21</b> |

## 1. General

HPLC analysis was performed on Waters 2695 using C18 analytical column (Phenomenex Gemini, 4.6×250 mm, 5 μm). LC-MS analysis was performed on Agilent 1100 with a mass spectrum detector (MSD) using an analytical column (Ultimate XB-C18, 2.1×100 mm, 3.0 μm). Chiral HPLC analysis was performed on Waters 2695 using chiral analytical columns (CHIRALPAK AD/AY-H, 4.6×250 mm, 5 μm). <sup>1</sup>H, <sup>13</sup>C were recorded on Bruker AV 400 MHz instrument at 400 MHz (<sup>1</sup>H NMR), 100 MHz (<sup>13</sup>C NMR) or Bruker AV 500 MHz instrument at 500 MHz (<sup>1</sup>H NMR), 125 MHz (<sup>13</sup>C NMR). Silica gel plates pre-coated on glass were used for thin-layer chromatography using UV light, or 7% ethanolic phosphomolybdic acid or potassium permanganate solution and heating as the visualizing methods. Silica gel was used for flash column chromatography with mixed CH<sub>2</sub>Cl<sub>2</sub> and MeOH or ethyl acetate (EtOAc) and hexane as the eluting solvents.

## 2. Materials

All commercially available chemicals and reagents, including ketone **1**, amines **a-g**, and NADP<sup>+</sup>, were purchased from Meryer (Shanghai, China), Macklin (Shanghai, China), J&K Scientific (Beijing, China), or Sigma-Aldrich (Poole, Dorset, UK) unless stated otherwise. All HPLC or LC-MS grade solvents, including acetonitrile, *n*-hexane, and ethanol, were purchased from Thermo Fisher Scientific (Waltham, Massachusetts, USA). Sodium phosphate buffer (0.1 M, pH 7.0) was prepared in-house.

## 3. Preparation of racemic amine and chiral amine standards

A dry methanol (10 mL) solution of the cyclic ketone (2.0 mmol), the corresponding amine (3.0 mmol), and acetic acid (300 μL) was stirred for 1.5 h at r.t. under an N<sub>2</sub> atm. The reaction was placed in an ice-H<sub>2</sub>O bath and sodium cyanoborohydride (0.377 g, 6.0 mmol) was added. Then the reaction mixture gradually warmed to r.t. and stirred overnight. The reaction progress was monitored by TLC and following completion was quenched with saturated NaHCO<sub>3</sub> solution (10 mL) was used and stirred for an additional 30 minutes. The mixture was extracted with EtOAc (3 × 10 mL) and the combined organic phase was concentrated under reduced pressure after drying by anhydrous sodium sulfate (Na<sub>2</sub>SO<sub>4</sub>). Column chromatography on silica afforded the corresponding racemic amine. Using the same method, the optical pure standards can be prepared by the reduction amination reaction between the chiral amine and the corresponding ketone or aldehyde.

## 4. NMR data of amine products

### 4-benzylamino-1-boc-azepane, **1a**

Colourless oil.  $^1\text{H}$  NMR  $\delta_{\text{H}}$  (500 MHz,  $\text{CD}_3\text{OD}$ ) 7.44-7.52 (5H, overlap), 4.25 (2H, m), 3.65 (1H, m), 3.46 (1H, m), 3.41 (1H, m), 3.31 (1H, m), 3.21 (1H, m), 2.34 (1H, m), 2.23 (1H, m), 1.99 (1H, m), 1.78 (1H, m), 1.66 (2H, m), 1.47 (9H, s).  $^{13}\text{C}$  NMR  $\delta_{\text{C}}$  (125 MHz,  $\text{CD}_3\text{OD}$ ) 157.1, 157.0, 132.8, 130.9, 130.6, 130.3, 81.38, 8.3, 59.5, 59.4, 49.9, 49.7, 47.39, 46.7, 43.6, 43.0, 32.4, 32.1, 30.6, 30.3, 28.7, 25.6, 25.4. HRMS (ESI) calculated for  $\text{C}_{18}\text{H}_{28}\text{N}_2\text{O}_2$   $[\text{M} + \text{H}]^+$  305.2229, found: 305.2309.

#### **4-propylamino-1-boc-azepane, 1b**

Colorless oil.  $^1\text{H}$  NMR  $\delta_{\text{H}}$  (400 MHz,  $\text{CDCl}_3$ ) 3.53 (2H, m), 3.22 (2H, m), 2.97 (1H, s), 2.80 (2H, t,  $J = 8.0$  Hz), 2.32 – 2.06 (2H, m), 1.99 – 1.49 (6H, overlap), 1.42 (9H, s), 0.94 (3H, t,  $J = 7.4$  Hz).  $^{13}\text{C}$  NMR  $\delta_{\text{C}}$  (100 MHz,  $\text{CDCl}_3$ ) 155.37, 155.29, 79.87, 58.20, 57.84, 46.50, 45.72, 42.89, 42.39, 31.17, 30.87, 30.11, 29.42, 28.53, 25.21, 24.84, 19.81, 11.45. HRMS (ESI) calculated for  $\text{C}_{14}\text{H}_{28}\text{N}_2\text{O}_2$   $[\text{M} + \text{H}]^+$  257.2229, found: 257.2305.

#### **4-amylamino-1-boc-azepane, 1c**

Colorless oil.  $^1\text{H}$  NMR  $\delta_{\text{H}}$  (400 MHz,  $\text{CDCl}_3$ ) 3.53 (2H, s), 3.39 – 3.14 (2H, m), 2.99 (1H, d,  $J = 11.1$  Hz), 2.84 (2H, t,  $J = 8.2$  Hz), 2.21 (2H, m), 1.99 – 1.51 (6H, overlap), 1.44 (9H, s), 1.30 (4H, s), 0.88 (3H, s).  $^{13}\text{C}$  NMR  $\delta_{\text{C}}$  (100 MHz,  $\text{CDCl}_3$ ) 155.38, 155.29, 79.95, 58.29, 57.99, 46.48, 45.74, 44.98, 42.87, 42.38, 31.13, 30.81, 30.18, 29.46, 28.98, 28.55, 25.95, 25.22, 24.83, 22.25, 13.92. HRMS (ESI) calculated for  $\text{C}_{16}\text{H}_{32}\text{N}_2\text{O}_2$   $[\text{M} + \text{H}]^+$  285.2542, found: 285.2616.

#### **4-cyclopropylamino-1-boc-azepane, 1d**

Colorless oil.  $^1\text{H}$  NMR  $\delta_{\text{H}}$  (400 MHz,  $\text{CDCl}_3$ ) 3.65 – 3.40 (2H, m), 3.36 – 3.14 (2H, m), 3.03 (1H, s), 2.26 (3H, overlap), 1.98 – 1.83 (1H, m), 1.77 (1H, m), 1.60 (2H, m), 1.43 (9H, s), 0.90 (2H, d,  $J = 4.7$  Hz), 0.71 (2H, d,  $J = 7.1$  Hz).  $^{13}\text{C}$  NMR  $\delta_{\text{C}}$  (100 MHz,  $\text{CDCl}_3$ ) 155.44, 79.76, 59.58, 59.28, 46.45, 45.71, 42.81, 42.24, 31.95, 31.71, 30.66, 29.93, 28.55, 27.92, 25.02, 24.69, 4.32, 4.20, 4.12, 4.03. HRMS (ESI) calculated for  $\text{C}_{14}\text{H}_{26}\text{N}_2\text{O}_2$   $[\text{M} + \text{H}]^+$  255.2073, found: 255.2150.

#### **4-cyclobutylamino-1-boc-azepane, 1e**

Colorless oil.  $^1\text{H}$  NMR  $\delta_{\text{H}}$  (400 MHz,  $\text{CDCl}_3$ ) 3.65 (1H, t,  $J = 8.4$  Hz), 3.49 (2H, m), 3.24 (2H, m), 2.99 – 2.89 (1H, m), 2.39 – 2.04 (6H, overlap), 1.88 (2H, m), 1.78 (2H, m), 1.60 (2H, m), 1.43 (9H, s).  $^{13}\text{C}$  NMR  $\delta_{\text{C}}$  (100 MHz,  $\text{CDCl}_3$ ) 155.41, 155.31, 79.90, 56.88, 56.72, 49.85, 49.78, 46.54, 45.79, 42.74, 42.22, 31.51, 31.22, 30.33, 29.65, 28.55, 27.60, 27.46, 27.35, 25.12, 24.76, 15.58. HRMS (ESI) calculated for  $\text{C}_{15}\text{H}_{28}\text{N}_2\text{O}_2$   $[\text{M} + \text{H}]^+$  269.2229, found: 269.2300.

#### **4-phenethylamino-1-boc-azepane, 1f**

Colorless oil.  $^1\text{H}$  NMR  $\delta_{\text{H}}$  (400 MHz,  $\text{CDCl}_3$ )  $\delta$  7.34 – 7.20 (5H, overlap), 3.56 (2H, m), 3.29 (2H, m), 3.19 – 3.02 (5H, overlap), 2.23 (2H, m), 1.90 (2H, m), 1.72 (1H, m), 1.59 (1H, m), 1.47 (9H, s).  $^{13}\text{C}$  NMR  $\delta_{\text{C}}$  (100 MHz,  $\text{CDCl}_3$ ) 155.39, 155.28, 136.80, 128.99, 128.76, 127.23, 79.97, 77.48, 77.36, 77.16, 76.84, 58.57, 58.24, 46.52, 46.41, 45.68, 42.80, 42.30, 32.81, 31.49, 31.14, 30.33, 29.71, 28.55, 25.06, 24.72. HRMS (ESI) calculated for  $\text{C}_{19}\text{H}_{30}\text{N}_2\text{O}_2$   $[\text{M} + \text{H}]^+$  319.2386, found:

319.2488.

#### **4-phenylpropylamino-1-boc-azepane, 1g**

Colorless oil.  $^1\text{H NMR } \delta_{\text{H}}$  (400 MHz,  $\text{CDCl}_3$ ) 7.30 (2H, overlap), 7.21 (3H, overlap), 3.51 (2H, s), 3.21 (2H, m), 2.99 (1H, t,  $J = 10.6$  Hz), 2.94 – 2.82 (2H, m), 2.67 (2H, t,  $J = 7.6$  Hz), 2.29 – 1.99 (4H, overlap), 1.92 – 1.72 (2H, m), 1.65 (2H, m), 1.47 (9H, s).  $^{13}\text{C NMR } \delta_{\text{C}}$  (100 MHz,  $\text{CDCl}_3$ ) 155.39, 140.05, 128.77, 128.40, 126.53, 80.00, 77.48, 77.36, 77.16, 76.84, 58.66, 58.34, 46.39, 45.64, 44.61, 42.71, 42.24, 32.90, 31.11, 30.83, 30.21, 29.53, 28.56, 27.82, 25.09, 24.72. HRMS (ESI) calculated for  $\text{C}_{20}\text{H}_{32}\text{N}_2\text{O}_2$   $[\text{M} + \text{H}]^+$  333.2542, found: 333.2636.

#### **5. HPLC and chiral HPLC analysis**

All biotransformation products were analyzed by HPLC or LC-MS and the products were confirmed by ESI-MS or UV spectrum compared with standards. The chiral products and chiral amine standards were analyzed by chiral HPLC with different chiral columns and different solvent ratios of *n*-hexane and ethanol containing 0.02% diethylamine (Supplementary Figs. 1-7). The conversions were calculated according to the standard curves. Standard curves were plotted for varying concentrations of products using the UV detection wavelength of 210 nm (**1a**, **1f-1g**) or 204 nm (**1b-1e**), which were analyzed by Waters 2695 Separation Module and Waters 2996 Photodiode Array Detector with gradient method (1.0 mL/min, 20 min,  $\text{H}_2\text{O}/\text{MeCN}$ , 90/10 $\rightarrow$ 0/100, v/v) using C-18 analytic column (Phenomenex Gemini, 4.6 $\times$ 250 mm, 5  $\mu\text{m}$ ).

#### **6. Expression and purification of M5 and variants**

The plasmids containing the genes of IR-G36-M5 and its mutants were used to transform to *E. coli* BL21(DE3) competent cells for gene expression. Pre-cultures were grown in LB-medium (10 mL) containing 50  $\mu\text{g}/\text{mL}$  kanamycin overnight at 37  $^\circ\text{C}$  with shaking at 220 rpm. 1L LB cultures were inoculated with the pre-culture (10 mL) and incubated at 37 $^\circ\text{C}$ , with shaking at 220 rpm to an  $\text{OD}_{600}$  of 0.6-0.8. Gene expression was induced by the addition of 0.1 mM isopropyl- $\beta$ -D-thiogalactopyranoside (IPTG) and shaking was continued for 16 h at 18  $^\circ\text{C}$ , 180 rpm. The cells were then harvested by centrifugation at 5000 rpm for 30 min and resuspended in binding buffer (50 mM Tris-HCl buffer pH 8.0, 300 mM NaCl, containing 20 mM imidazole). Cells were disrupted by ultrasonication for 30 min, 5 s on, 9 s off cycles, and the suspension was centrifuged at 12,000 rpm for 25 min to yield a clear lysate. The *N*-terminal His-tagged proteins were purified using the Ni-NTA column. In each case, the lysate was loaded onto a pre-equilibrated Ni-NTA column, followed by washing with 40~60 mL washing buffer (50 mM Tris-HCl buffer pH 8.0, 300 mM NaCl, containing 40 mM imidazole). The bound protein was eluted with elution buffer containing 250 mM

imidazole. Proteins were concentrated, and used for biotransformation reactions.

## **7. Triple code saturation mutagenesis library construction and screening procedure**

Triple code saturation mutagenesis (A/L/F) library were constructed using Fast Mutagenesis System (TransGen Biotech). The primers of the mutation site were referred to in Supplementary Table 1. Cell-free extract of variants of M5 were used to measuring the enantioselectivity for ketone **1** and amine **a**. A typical 5 mL reaction mixture contained 30 mM ketone **1**, 33 mM amine **a** (1.1 eq), 1 mM NADP<sup>+</sup>, cell-free extracts (10 g/L, wet cells weight), 45 mM *D*-glucose (1.5 eq), 1 mg/mL glucose dehydrogenase (GDH), and 10% DMSO in sodium phosphate buffer (100 mM, pH 7.0). All reactions were incubated at 30 °C with shaking at 220 rpm for 24 h, after which they were quenched by 1 mL saturated sodium carbonate (NaHCO<sub>3</sub>) and extracted with ethyl acetate (3×5 mL). The combined organic extracts were finally dried using anhydrous Na<sub>2</sub>SO<sub>4</sub>, and the solvent was removed under reduced pressure. The extracts were dissolved in ethanol and subjected to HPLC analysis for measurement of the ee values.

## **8. Site-saturation mutagenesis libraries construction and screening procedure**

Site-saturation mutagenesis libraries were also constructed using Fast Mutagenesis System (TransGen Biotech). The codon of the mutation site was replaced by the NNK degeneracy codon (Supplementary Table 1). Colonies were picked up in 96-well plates containing 600 µL LB medium with 50 µg/mL kanamycin and cultured overnight at 37 °C with 800 rpm. The 19 diverse variants with the mutation site respectively replaced by the remaining AA residues were obtained through DNA sequencing. Pre-cultures of the variants were grown in LB-medium (5 mL) containing 50 µg/mL kanamycin overnight at 37 °C with shaking at 220 rpm. An aliquot of 500 µL was transferred to a new culture flask containing 50 mL LB medium with 50 µg/mL kanamycin and cultured at 37 °C with shaking at 220 rpm to an OD<sub>600</sub> of 0.6–0.8. The cells were induced with 0.1 mM isopropyl-β-D-thiogalactopyranoside (IPTG) for 16 h at 20 °C, 220 rpm. The cells were harvested and washed twice with 10 mL potassium phosphate buffer (100 mM, pH 7.0) and centrifuged for 30 min with 4000 rpm. Then, the pellets were resuspended in 3 mL of the same buffer containing 6 U DNase I and 1 mg/mL lysozyme for breaking the cell at 30 °C, 200 rpm for 2 h. Then, 2 mL stock solution containing ketone **1** (30 mM, 1eq), amine **a** (33 mM, 1.1eq), NADP<sup>+</sup> (1 mM), *D*-glucose (45 mM, 1.5 eq), 1 mg/mL glucose dehydrogenase (GDH), and 20% v/v DMSO was added. After being shaken for 24 h at 30 °C with 200 rpm, reactions were quenched by 1 mL saturated NaHCO<sub>3</sub> and extracted with ethyl acetate (3×5 mL). The combined organic extracts were dried by anhydrous

Na<sub>2</sub>SO<sub>4</sub> and evaporated under reduced pressure for further detecting the e.e. values by HPLC analysis.

## 9. Biotransformation for purification enzyme

For analyzing the reductive aminations of ketone **1** and amines **a-g**, enzyme of M5-I149Y/L200H/W234K was purified. A typical 5 mL reaction mixture contained 30-80 mM ketone **1** with amine **a** (1.1 eq), or 60 mM amine **1** with amine **b-g** (1.1 eq), 1 mM NADP<sup>+</sup>, purification enzyme (5 mg/mL), D-glucose (1.5 eq), 1 mg/mL glucose dehydrogenase (GDH), and 20% DMSO in sodium phosphate buffer (100 mM, pH 7.0). All reactions were incubated at 30 °C with shaking at 220 rpm for 24 h, and were quenched by 1 mL saturated NaHCO<sub>3</sub>. The liquids were extracted with ethyl acetate (3×5 mL) and the combined organic extracts were evaporated under reduced pressure after drying by anhydrous Na<sub>2</sub>SO<sub>4</sub>. The extracts were dissolved in ethanol and subjected to HPLC analysis for measurement of the conversions and e.e. values.

## 10. Molecular docking

Molecular docking was performed by using the CDOCKER procedure of Discovery Studio Client. The previously reported crystal structure of M5 (PDB: 7WNW) was used as the receptor target in this study, which was a complex with NADP<sup>+</sup>. The docking of imine intermediate of **1a'** into M5 was performed using a flexible docking protocol. Docking runs were carried out using the standard parameters of the program. The conformations with the lowest energy were chosen for the analysis of substrate-enzyme interactions and distance between carbonyl group of the substrate and C<sub>4</sub>-H of NADPH.

## 11. Sequence of IR-G36-M5 and the triple-mutant

### *DNA sequence of IR-G36-M5*

ATGGGCAGCAGCCATCATCATCATCACAGCAGCGGCCTGGTGCCGCGCGGCAGCCATATGCCGG  
AATCTACCACCCCGAGTACCGCCACCCCGGTGACCATCATCGGTCTTGGTGCAATGGGCACCGCCCT  
GGCAAACGCATTCTCGATGCAGGTCATAGTACCACCGTTTGAATCGTACCGCAGCACGCGCCACC  
GCATTAGCCGCACGCGGCACATCATGCAGAAACCGTGACCGAAGCCATTGCAGCCTCTCCGTTAG  
TGATTGCCTGTGTGCTGGATTATGATGCCTTTCATGAAACCTTAGCCCCGGCTACAGACGCGCTGGCA  
GGTCGCGCCCTGGTTAATCTGACCACAGGTACCCCGAAACAGGCACGCGAAACCGCCTCTTGGGCAG  
CCGATCATCGTATTGATTATCTGGATGGCAAATTATGGCCATTCCGCCGGGTATTGCAACCCCGGAT  
AGTTTTATTCTGTATAGCGGTCCGTTAGGTACCTTTGAAGCACATCGCTCAACCTTAGAAGTGCTGGG  
CGCAGCAAATCATGTGGGTACCGATGCAGGTTTGGCGAGCTTACATGATATTGCACTGCTGACCGGT  
ATGTATGGCATGATTGCAGGCATTTTACAGGCCTTGCCTTAATTGATAGTGAAGGTATTCCGGCAGG

CGATCTGGCCCCGATGTAAACCAATTGGTTAACCGGGCGCAGCACATAGCGTGGCCCATTATGCCAG  
CAGATTGATACCGGGCATTATGAAACCGGTGTTGTGTTAATTTAGCACATCAGAGCCATGGCTTTGC  
AAAATTAGTTCAGGCCGGTGAAGATCAGGGTGTGGATGTGGGCTTACTGCGTCCGCTGTTTGAAGT  
ATGCGTCATCAGGTTGCCGCAGGCTATGGTAATGGTGTGTTGCCTCAGTTATTGAACTGATTTCGTCG  
CGAAGAACGTCGTCAGCCGGCCAAAAGTCCGGGGCGCAGATAAAAATTACCCGTGCACGTCGTCGTA  
A

*Amino acid sequence IR-G36-M5*

MGSSHHHHHHSSGLVPRGSHMPESTTPSTATPVTHIIGLGAMGTALANAFDAGHSTTVWNRAARATAL  
AARGAHHAEVTEAIAASPLVIACVLDYDAFHETLAPATDALAGRALVNLTTGTPKQARETASWAADHR  
IDYLDGKIMAIPPGIATPDSFILYSGPLGTFEAHRSTLEVLGAANHVGTDAGLASLHDIALLTGMYGMIAGI  
LQAFALIDSEGIPAGDLAPMLTNWLTGAAHSV AHYAQQIDTGDYETGVVFNLAHQSHGFAKLVQAGED  
QGV DVGLLRPLFELMRHQVAAGYGNQDVASVIELIRREERRQPAKSPGADKTRARRP\*

*DNA sequence of M5-II49Y-L200H-W234K*

ATGGGCAGCAGCCATCATCATCATCACAGCAGCGGCCTGGTGCCGCGCGGCAGCCATATGCCGG  
AATCTACCACCCCGAGTACCGCCACCCCGGTGACCATCATCGGTCTTGGTGCAATGGGCACCGCCT  
GGCAAACGCATTCCCTCGATGCAGGTCATAGTACCACCGTTTGAATCGTACCGCAGCACGCGCCACC  
GCATTAGCCGCACGCGGCACATCATGCAGAAACCGTGACCGAAGCCATTGCAGCCTCTCCGTTAG  
TGATTGCCTGTGTGCTGGATTATGATGCCTTTCATGAAACCTTAGCCCCGGCTACAGACGCGCTGGCA  
GGTCGCGCCCTGGTTAATCTGACCACAGGTACCCCGAAACAGGCACGCGAAACCGCCTCTTGGGCAG  
CCGATCATCGTATTGATTATCTGGATGGCAAATTATGGCCTATCCGCGGGTATTGCAACCCCGGAT  
AGTTTTATTCTGTATAGCGGTCCGTTAGGTACCTTTGAAGCACATCGCTCAACCTTAGAAGTGCTGGG  
CGCAGCAAATCATGTGGGTACCGATGCAGGTTTGGCGAGCTTACATGATATTGCACTGCATAACCGGT  
ATGTATGGCATGATTGCAGGCATTTTACAGGCCTTTCCTTAATTGATAGTGAAGGTATTCCGGCAGG  
CGATCTGGCCCCGATGTAAACCAATAAATTAACCGGGCGCAGCACATAGCGTGGCCCATTATGCCAG  
CAGATTGATACCGGGCATTATGAAACCGGTGTTGTGTTAATTTAGCACATCAGAGCCATGGCTTTGC  
AAAATTAGTTCAGGCCGGTGAAGATCAGGGTGTGGATGTGGGCTTACTGCGTCCGCTGTTTGAAGT  
ATGCGTCATCAGGTTGCCGCAGGCTATGGTAATGGTGTGTTGCCTCAGTTATTGAACTGATTTCGTCG  
CGAAGAACGTCGTCAGCCGGCCAAAAGTCCGGGGCGCAGATAAAAATTACCCGTGCACGTCGTCGTA  
A

*Amino acid sequence M5-II49Y-L200H-W234K*

MGSSHHHHHHSSGLVPRGSHMPESTTPSTATPVTHIIGLGAMGTALANAFDAGHSTTVWNRAARATAL  
AARGAHHAEVTEAIAASPLVIACVLDYDAFHETLAPATDALAGRALVNLTTGTPKQARETASWAADHR  
IDYLDGKIMAYPPGIATPDSFILYSGPLGTFEAHRSTLEVLGAANHVGTDAGLASLHDIALHTGMYGMIAG  
ILQAFALIDSEGIPAGDLAPMLTNKLTGAAHSV AHYAQQIDTGDYETGVVFNLAHQSHGFAKLVQAGED



QGV DVGLLRPLFELMRHQVAAGYGNGDVASVIELIRREERRQPAKSPGADKITRARRP\*

## Supplementary Tables

**Table 1.** List of primers in this study.

| Primer | mutant | Sequences (5'→3')                                |
|--------|--------|--------------------------------------------------|
| F      | S241A  | AGCACAT <u>GCCG</u> TGGCCCATTATGCCCA             |
| R      | S241A  | GGGCCAC <u>GGC</u> ATGTGCTGCGCCGGTTAA            |
| F      | S241L  | AGCACAT <u>TTA</u> GTGGCCCATTATGCCCAG            |
| R      | S241L  | GGGCCAC <u>TAA</u> ATGTGCTGCGCCGGTTAA            |
| F      | S241F  | GCGCAGCACAT <u>TTT</u> GTGGCCCATTATGCCCAGCAGATT  |
| R      | S241F  | ATAATGGGCCAC <u>AAA</u> ATGTGCTGCGCCGGTTAACCAATT |
| F      | M203A  | ACCGGT <u>GCA</u> TATGGCATGATTGCAGGCATT          |
| R      | M203A  | GCCATAT <u>GCA</u> CCGGTCAGCAGTGCAATAT           |
| F      | M203L  | ACCGGT <u>TTA</u> TATGGCATGATTGCAGGCATT          |
| R      | M203L  | GCCATATA <u>AAA</u> CCGGTCAGCAGTGCAATATC         |
| F      | M203F  | ACCGGT <u>TTT</u> TATGGCATGATTGCAGGCATT          |
| R      | M203F  | GCCATA <u>AAA</u> CCGGTCAGCAGTGCAATATC           |
| F      | I149A  | TATGGCC <u>GCA</u> CCGCCGGGTATTGCAACCC           |
| R      | I149A  | CCCGGCGG <u>TGC</u> GGCCATAATTTTGCCATC           |
| F      | I149L  | TATGGCC <u>TTA</u> CCGCCGGGTATTGCAACCC           |
| R      | I149L  | CCCGGCGG <u>TAA</u> GGCCATAATTTTGCCATCC          |
| F      | I149F  | TATGGCC <u>TTT</u> CCGCCGGGTATTGCAACCC           |
| R      | I149F  | CCCGGCGG <u>AAA</u> GGCCATAATTTTGCCATCC          |
| F      | W234A  | TTAACCAAT <u>GCA</u> TTAACCGGCGCAGCACAT          |
| R      | W234A  | CCGGTTAAT <u>GCA</u> TGGTTAACATCGGGGCC           |
| F      | W234L  | TTAACCAAT <u>TTA</u> TTAACCGGCGCAGCACAT          |
| R      | W234L  | CCGGTTAAT <u>AAA</u> ATTGGTTAACATCGGGGCC         |
| F      | W234F  | TTAACCAAT <u>TTT</u> TTAACCGGCGCAGCACAT          |
| R      | W234F  | CCGGTTA <u>AAA</u> AATTGGTTAACATCGGGGCC          |
| F      | L200A  | GCACTGGCCACCGGTATGTATGGCATG                      |
| R      | L200A  | CATACCGGTGGCCAGTGCAATATCATG                      |
| F      | L200F  | GCACTG <u>TTT</u> ACCGGTATGTATGGCATG             |
| R      | L200F  | CATACCGGT <u>AAA</u> CAGTGCAATATCATG             |
| F      | A238L  | AACCGGC <u>TGG</u> CACATAGCGTGGCCCATTA           |
| R      | A238L  | ATGTGCC <u>AGG</u> CCGGTTAACCAATTGGTTAA          |
| F      | A238F  | AACCGGC <u>TTT</u> GACATAGCGTGGCCCATTA           |

|   |         |                                |
|---|---------|--------------------------------|
| R | A238F   | ATGTGCAAAGCCGGTTAACCAATTGGTTAA |
| F | W234NNK | ACCAATNNKTTAACCGGCGCAGCACATAGC |
| R | W234NNK | GCCGGTTAAMNNATTGGTTAACATCGGGGC |
| F | L200NNK | GCACTGNNKACCGGTATGTATGGCATGA   |
| R | L200NNK | CCGGTMNNCAGTGCAATATCATGTAAGC   |
| F | I149NNK | TATGGCCNNKCCGCCGGGTATTGCAACCC  |
| R | I149NNK | CCGGCGGMNNGGCCATAATTTTGCCATCC  |

**Table 2.** Enantioselectivity of the mutants generated by Triple code saturation mutagenesis (A/L/F) of residues S241, M203, and A238 over M5.

| Mutants | ee value      | Mutants | ee value      | Mutants | ee value      |
|---------|---------------|---------|---------------|---------|---------------|
| S241A   | 38%, <i>S</i> | M203A   | 57%, <i>S</i> | A238L   | 42%, <i>S</i> |
| S241L   | 30%, <i>S</i> | M203L   | 22%, <i>S</i> | A238F   | 31%, <i>S</i> |
| S241F   | 9%, <i>S</i>  | M203F   | 48%, <i>S</i> |         |               |

**Table 3.** Enantioselectivity of the mutants generated by site-saturation mutagenesis of residue W234 over M5.

| Mutants | ee value      | Mutants | ee value      | Mutants | ee value      |
|---------|---------------|---------|---------------|---------|---------------|
| W234H   | 48%, <i>S</i> | W234M   | 48%, <i>S</i> | W234N   | 76%, <i>S</i> |
| W234R   | 83%, <i>S</i> | W234P   | 71%, <i>S</i> | W234Q   | 71%, <i>S</i> |
| W234K   | 89%, <i>S</i> | W234W   | -             | W234Y   | 62%, <i>S</i> |
| W234A   | 75%, <i>S</i> | W234G   | 75%, <i>S</i> | W234D   | 74%, <i>S</i> |
| W234L   | 56%, <i>S</i> | W234C   | 59%, <i>S</i> | W234E   | 70%, <i>S</i> |
| W234I   | 48%, <i>S</i> | W234S   | 74%, <i>S</i> | W234F   | 37%, <i>S</i> |
| W234V   | 58%, <i>S</i> | W234T   | 62%, <i>S</i> |         |               |

**Table 4.** Enantioselectivity of the mutants generated by site-saturation mutagenesis of residue I149 over M5.

| Mutants | ee value      | Mutants | ee value      | Mutants | ee value      |
|---------|---------------|---------|---------------|---------|---------------|
| I149H   | 81%, <i>S</i> | I149M   | 38%, <i>S</i> | I149N   | 72%, <i>S</i> |
| I149R   | 77%, <i>S</i> | I149P   | 70%, <i>S</i> | I149Q   | 48%, <i>S</i> |
| I149K   | 69%, <i>S</i> | I149W   | 85%, <i>S</i> | I149Y   | 91%, <i>S</i> |
| I149A   | 49%, <i>S</i> | I149G   | 66%, <i>S</i> | I149D   | 71%, <i>S</i> |
| I149L   | 42%, <i>S</i> | I149C   | 50%, <i>S</i> | I149E   | 47%, <i>S</i> |
| I149I   | -             | I149S   | 55%, <i>S</i> | I149F   | 88%, <i>S</i> |
| I149V   | 20%, <i>S</i> | I149T   | 48%, <i>S</i> |         |               |

**Table 5.** Enantioselectivity of the mutants generated by site-saturation mutagenesis of residue L200 over M5.

| <b>Mutants</b> | <b>ee value</b> | <b>Mutants</b> | <b>ee value</b> | <b>Mutants</b> | <b>ee value</b> |
|----------------|-----------------|----------------|-----------------|----------------|-----------------|
| L200H          | 71%, <i>S</i>   | L200M          | 51%, <i>S</i>   | L200N          | 0%, <i>S</i>    |
| L200R          | N.D.            | L200P          | N.D.            | L200Q          | 28%, <i>S</i>   |
| L200K          | N.D.            | L200W          | 7%, <i>R</i>    | L200Y          | 0%, <i>S</i>    |
| L200A          | 24%, <i>S</i>   | L200G          | 25%, <i>S</i>   | L200D          | 16%, <i>S</i>   |
| L200L          | -               | L200C          | 24%, <i>R</i>   | L200E          | 25%, <i>S</i>   |
| L200I          | 3%, <i>S</i>    | L200S          | 6%, <i>S</i>    | L200F          | 23%, <i>R</i>   |
| L200V          | 23%, <i>R</i>   | L200T          | 27%, <i>R</i>   |                |                 |

N.D. was not determined because the mutants were almost inactivated.

## Chiral HPLC Chromatograms

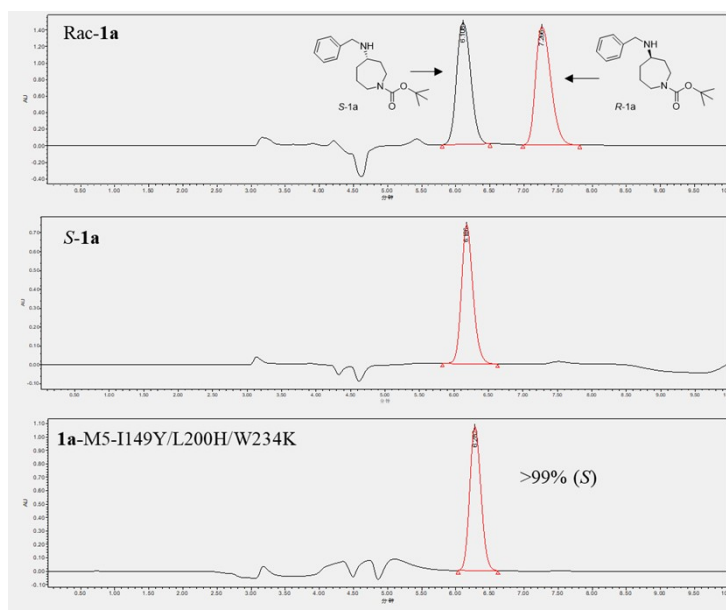

**Figure 1.** Chiral HPLC analysis of racemic standard of **1a** (up), optically pure standard of (*S*)-**1a** (middle), and M5-I149Y/L200H/W234K catalytic product **1a** (bottom). HPLC conditions: CHIRALPAK AD-H column with a mobile phase of *n*-hexane/ethanol (90:10, v/v, 0.2% diethylamine), flow rate 1.0 mL/min, 30 °C, UV detection at 210 nm.

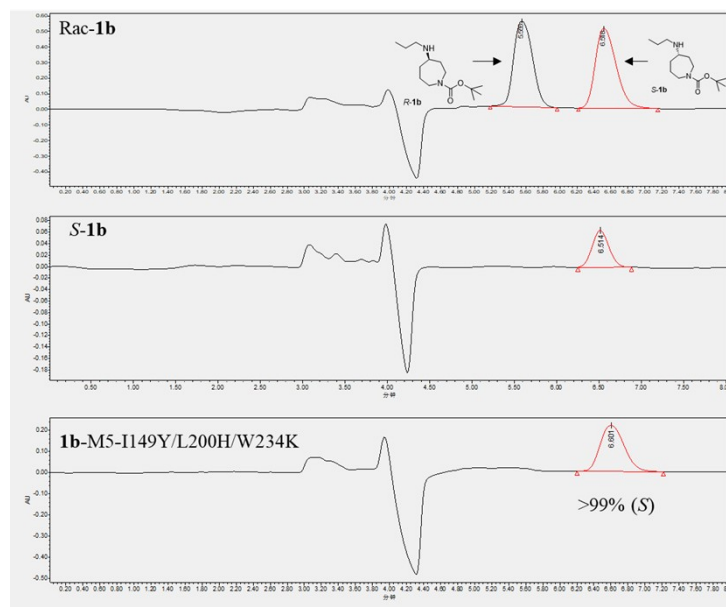

**Figure 2.** Chiral HPLC analysis of racemic standard of **1b** (up), optically pure standard of (*S*)-**1b** (middle), and M5-I149Y/L200H/W234K catalytic product **1b** (bottom). HPLC conditions: CHIRALPAK IG column with a mobile phase of *n*-hexane/ethanol (80:20, v/v, 0.2% diethylamine), flow rate 1.0 mL/min, 30 °C, UV detection at 204 nm.

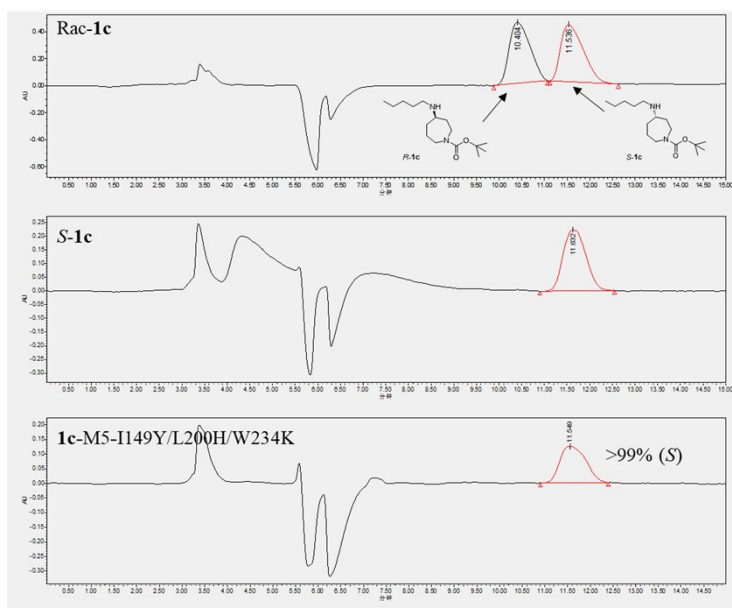

**Figure 3.** Chiral HPLC analysis of racemic standard of **1c** (up), optically pure standard of (*S*)-**1c** (middle), and M5-I149Y/L200H/W234K catalytic product **1c** (bottom). HPLC conditions: CHIRALPAK IG column with a mobile phase of *n*-hexane/ethanol (95:5, v/v, 0.2% diethylamine), flow rate 1.0 mL/min, 30 °C, UV detection at 204 nm.

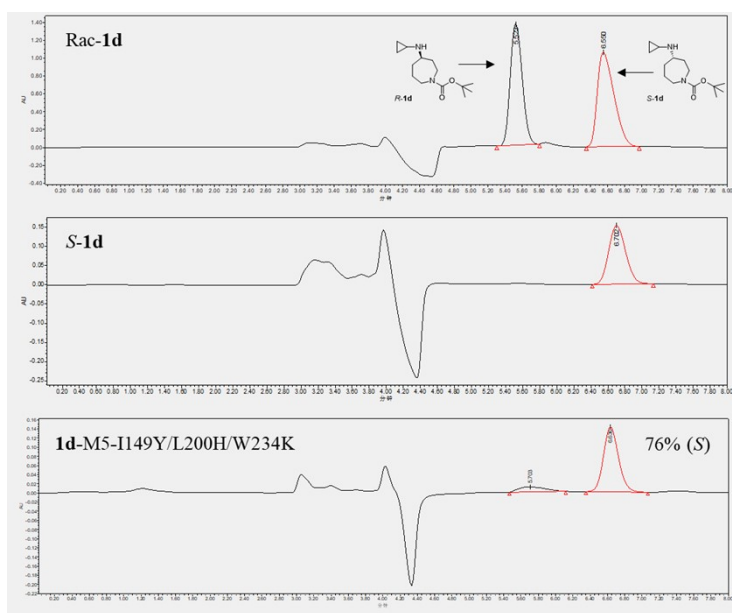

**Figure 4.** Chiral HPLC analysis of racemic standard of **1d** (up), optically pure standard of (*S*)-**1d** (middle), and M5-I149Y/L200H/W234K catalytic product **1d** (bottom). HPLC conditions: CHIRALPAK IG column with a mobile phase of *n*-hexane/ethanol (80:20, v/v, 0.2% diethylamine), flow rate 1.0 mL/min, 30 °C, UV detection at 204 nm.

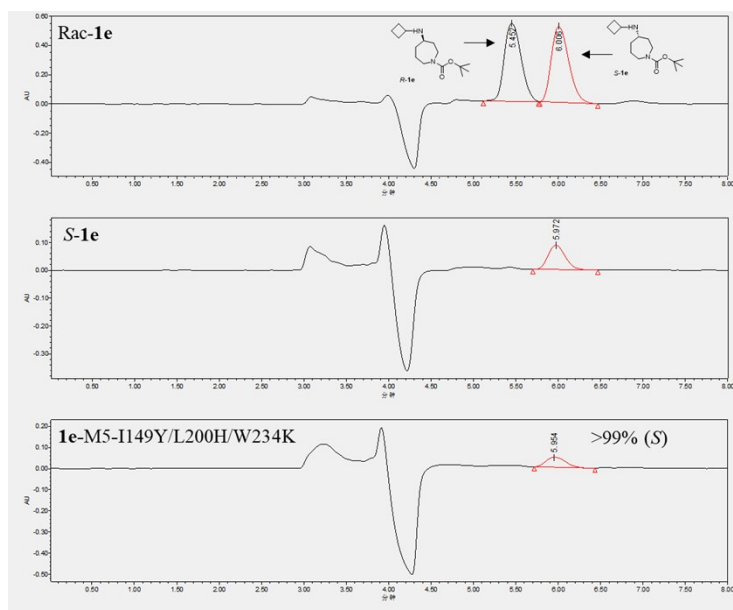

**Figure 5.** Chiral HPLC analysis of racemic standard of **1e** (up), optically pure standard of (*S*)-**1e** (middle), and M5-I149Y/L200H/W234K catalytic product **1e** (bottom). HPLC conditions: CHIRALPAK IG column with a mobile phase of *n*-hexane/ethanol (80:20, v/v, 0.2% diethylamine), flow rate 1.0 mL/min, 30 °C, UV detection at 204 nm.

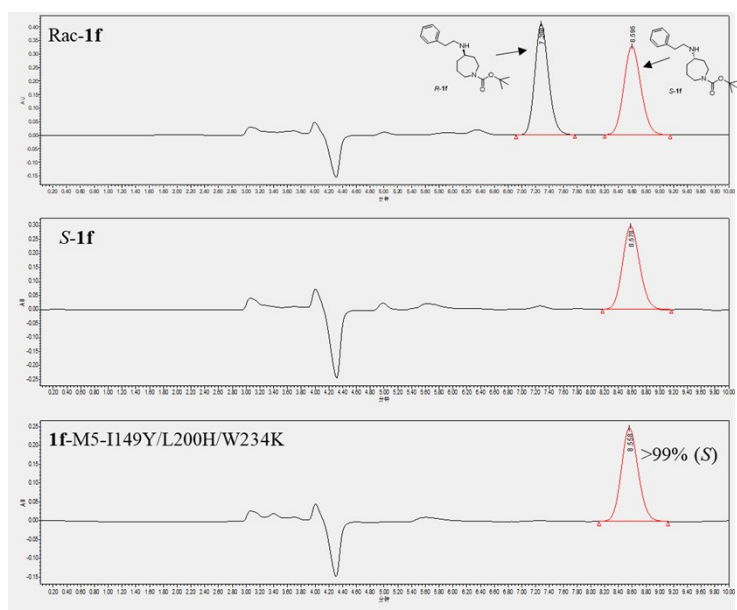

**Figure 6.** Chiral HPLC analysis of racemic standard of **1f** (up), optically pure standard of (*S*)-**1f** (middle), and M5-I149Y/L200H/W234K catalytic product **1f** (bottom). HPLC conditions: CHIRALPAK IG column with a mobile phase of *n*-hexane/ethanol (80:20, v/v, 0.2% diethylamine), flow rate 1.0 mL/min, 30 °C, UV detection at 210 nm.

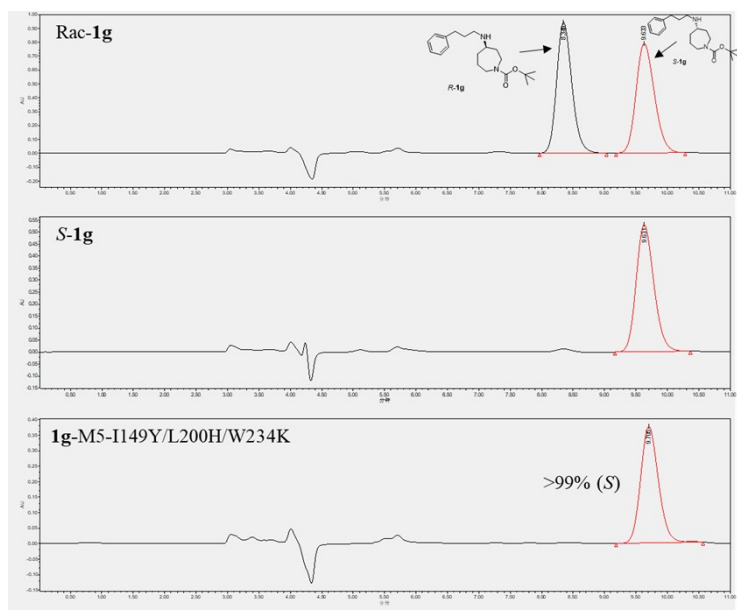

**Figure 7.** Chiral HPLC analysis of racemic standard of **1g** (up), optically pure standard of (*S*)-**1g** (middle), and M5-I149Y/L200H/W234K catalytic product **1g** (bottom). HPLC conditions: CHIRALPAK IG column with a mobile phase of *n*-hexane/ethanol (80:20, v/v, 0.2% diethylamine), flow rate 1.0 mL/min, 30 °C, UV detection at 210 nm.



## NMR spectra of amine products

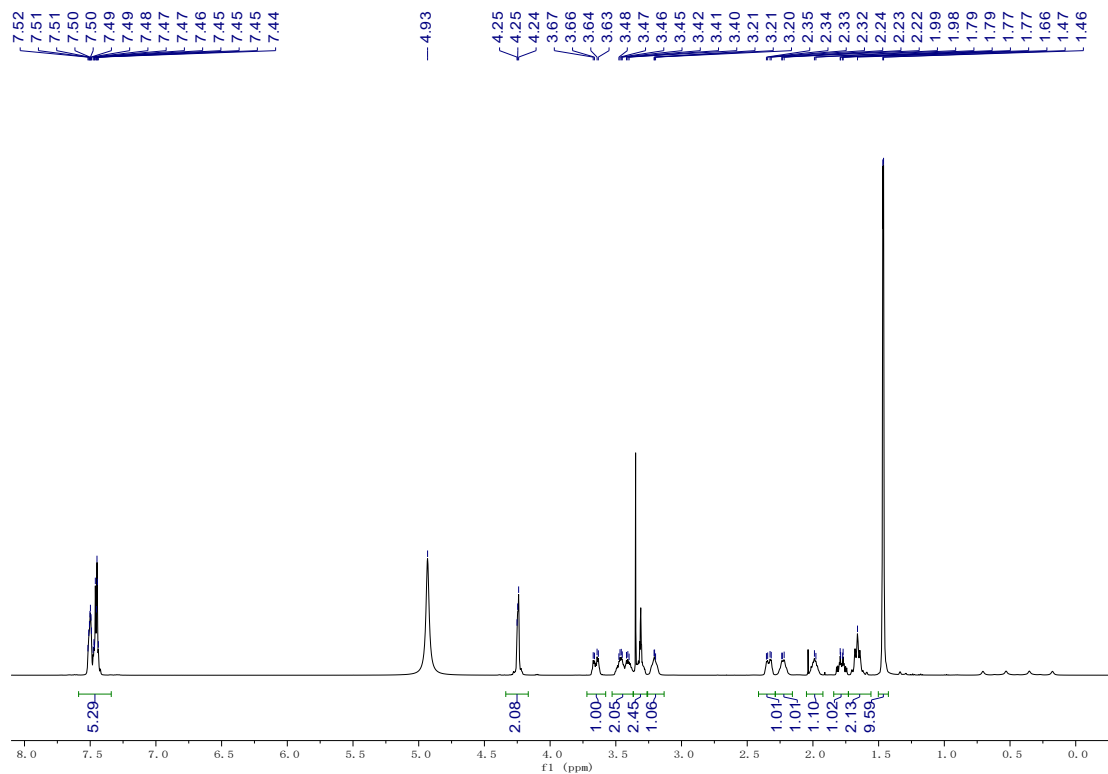

**Figure 8.** The  $^1\text{H}$  NMR spectrum of **1a** in methanol- $d_4$  (500 MHz)

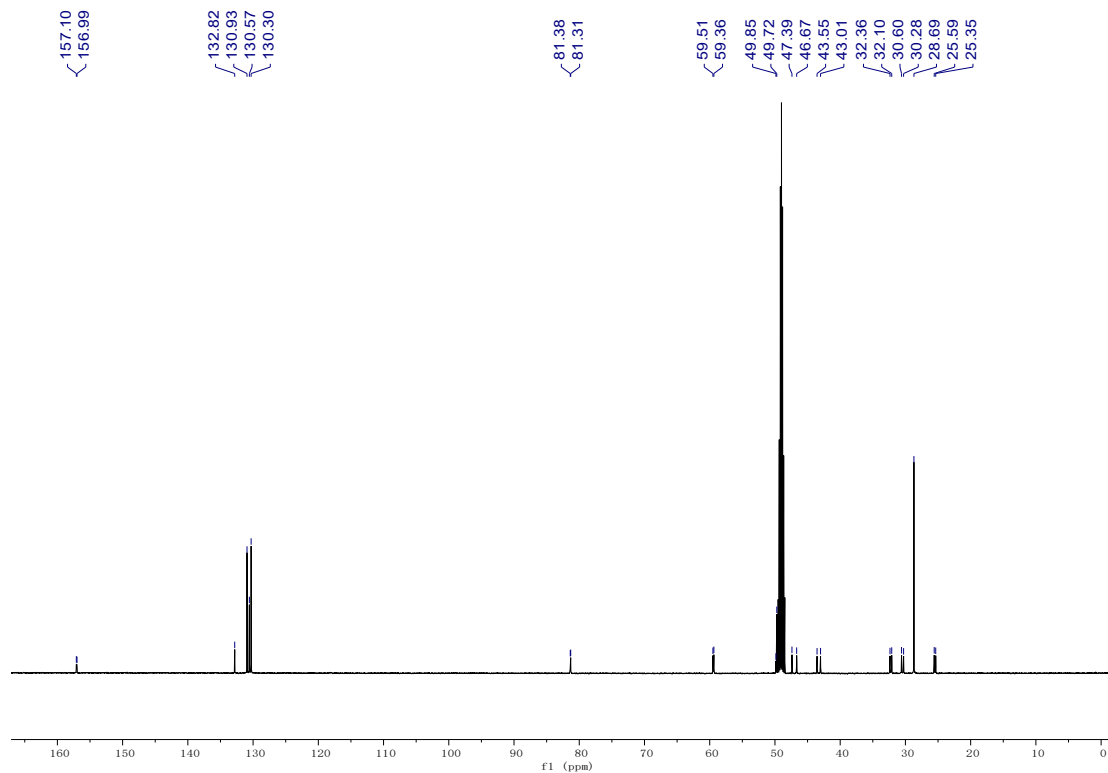

**Figure 9.** The  $^{13}\text{C}$  NMR spectrum of **1a** in methanol- $d_4$  (125 MHz)

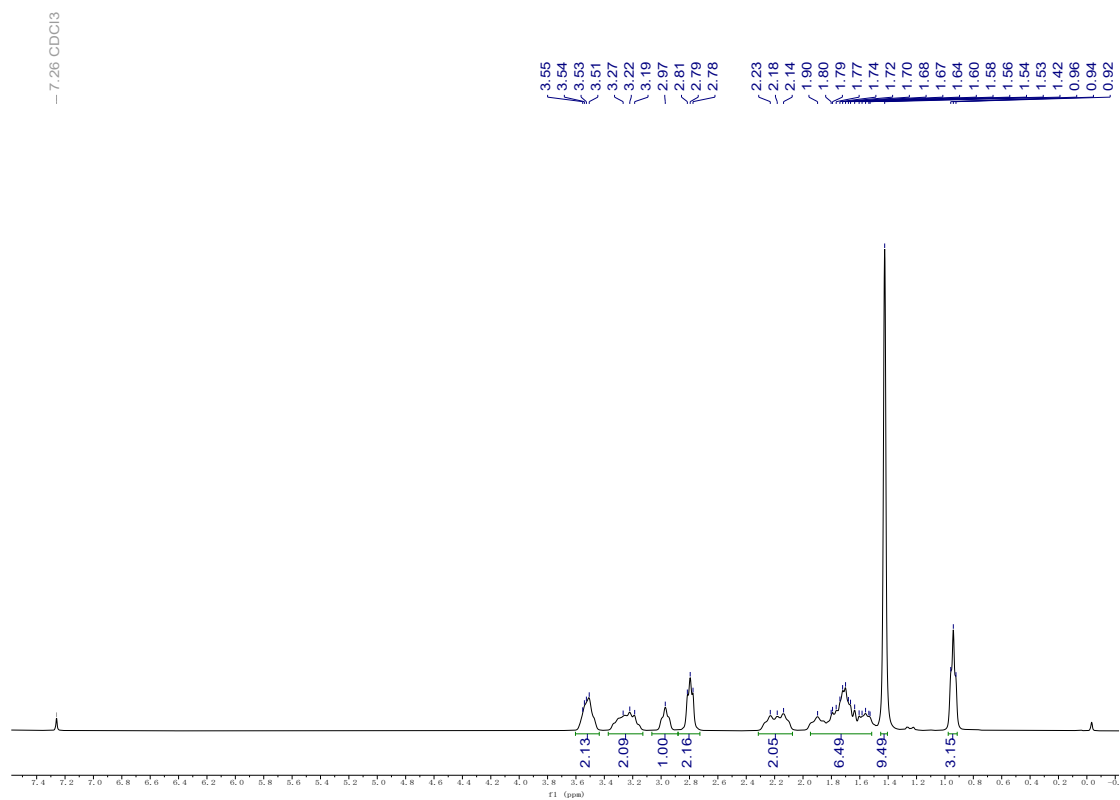

**Figure 10.** The <sup>1</sup>H NMR spectrum of **1b** in chloroform-*d* (400 MHz)

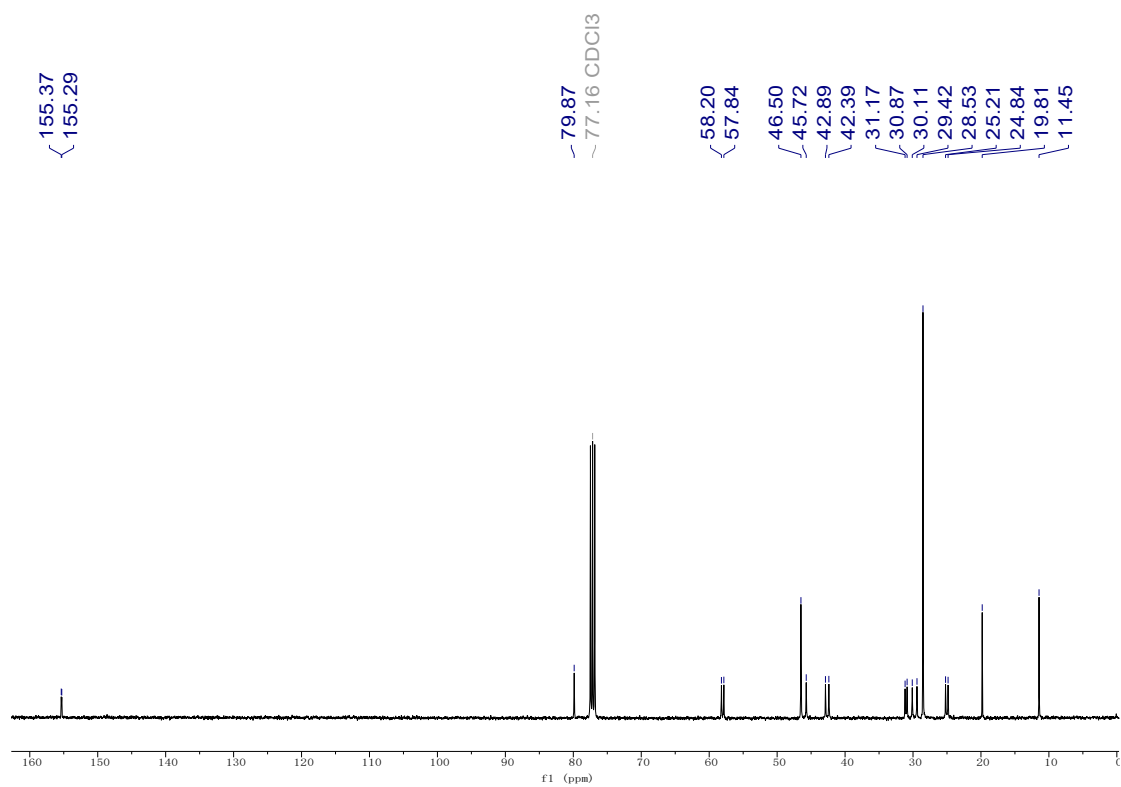

**Figure 11.** The  $^{13}\text{C}$  NMR spectrum of **1b** in chloroform-*d* (100 MHz)

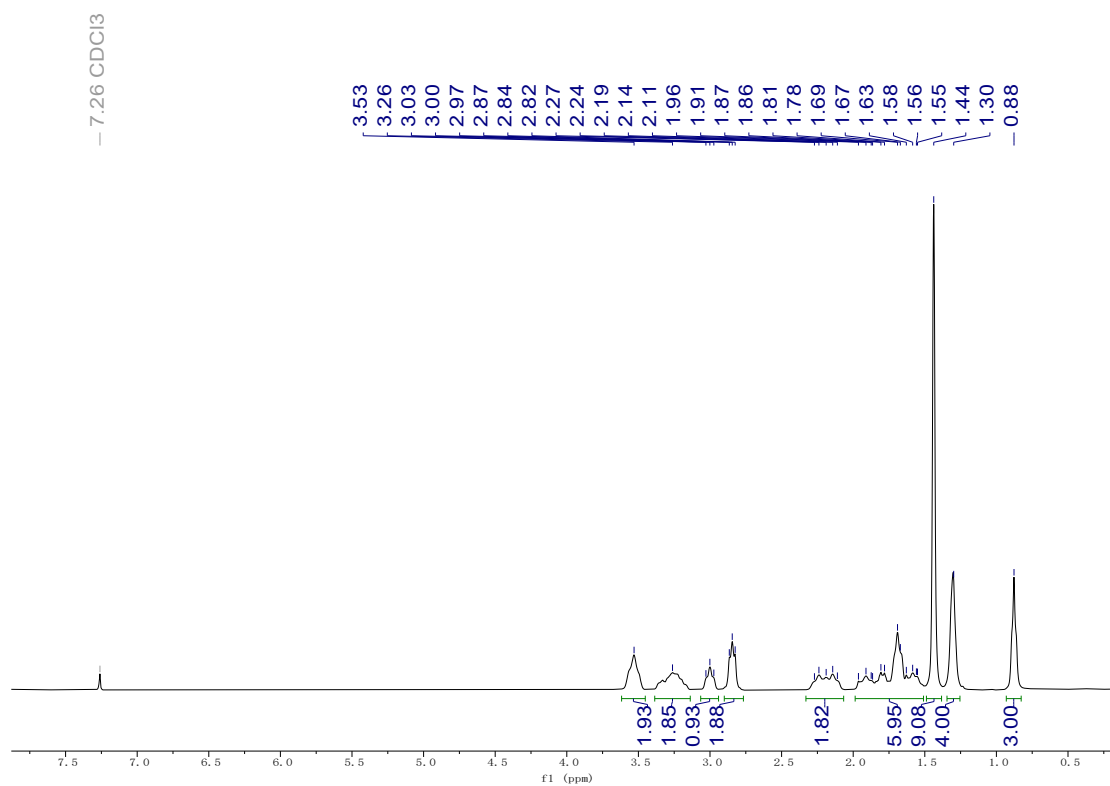

**Figure 12.** The  $^1\text{H}$  NMR spectrum of **1c** in chloroform-*d* (400 MHz)

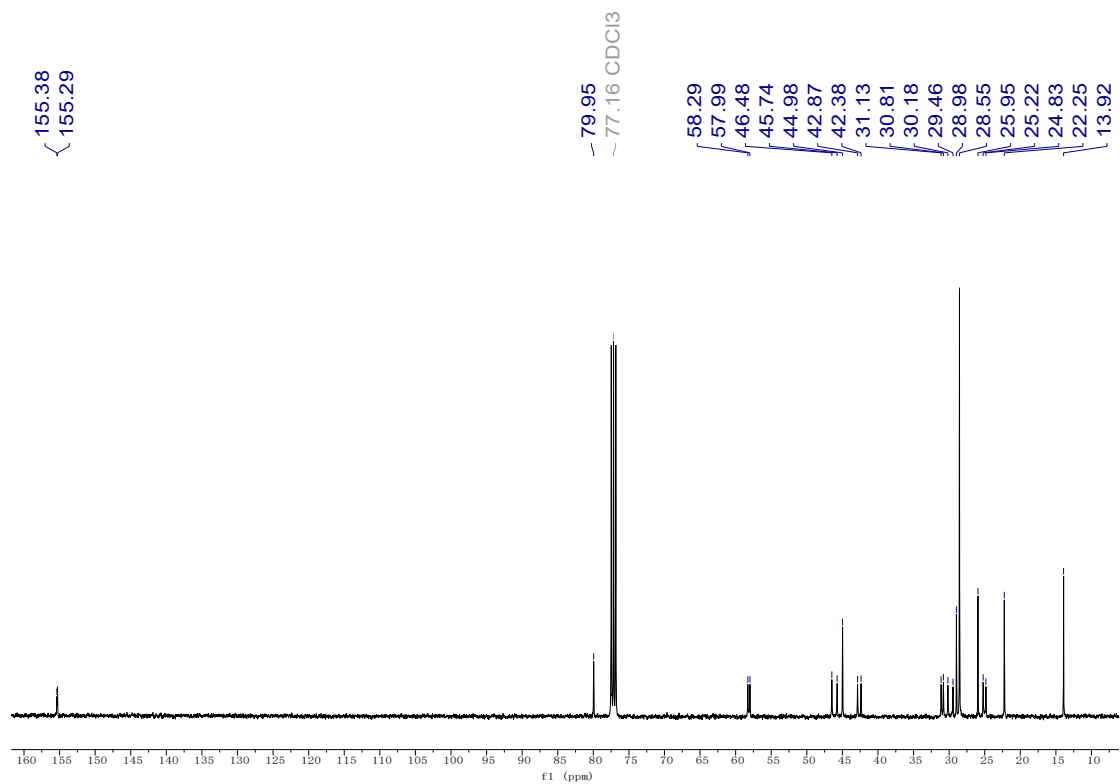

**Figure 13.** The  $^{13}\text{C}$  NMR spectrum of **1c** in chloroform-*d* (100 MHz)

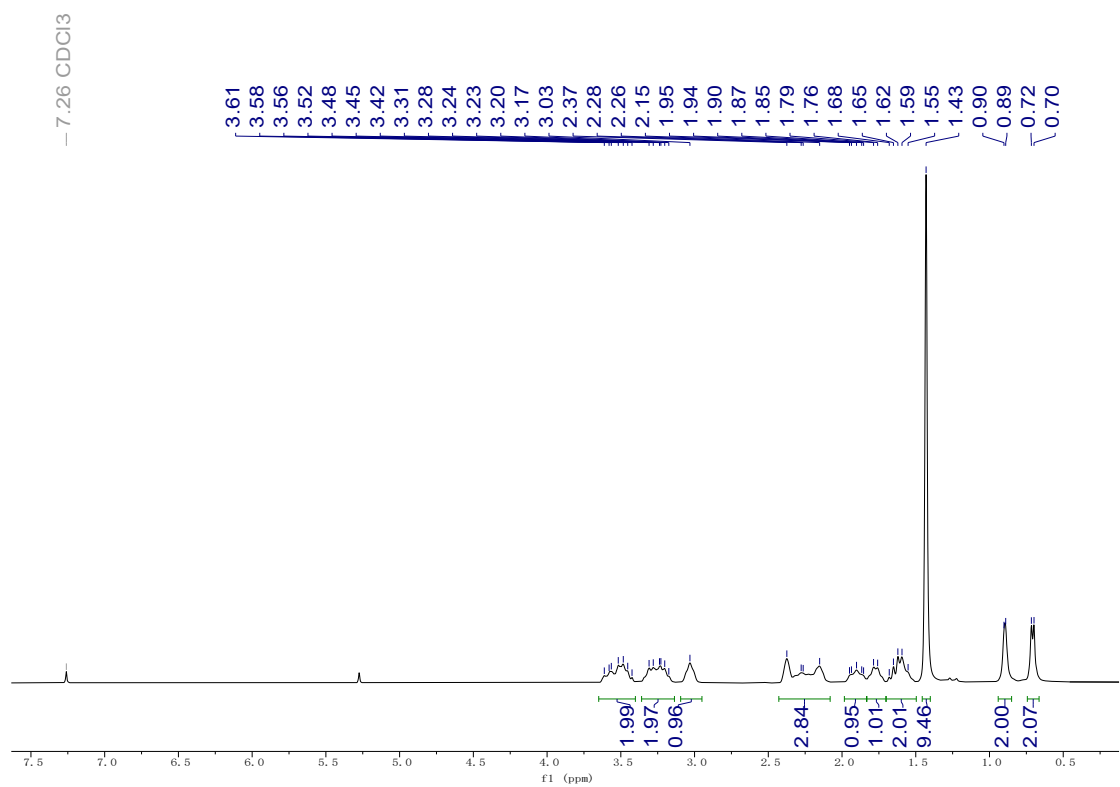

**Figure 14.** The  $^1\text{H}$  NMR spectrum of **1d** in chloroform-*d* (400 MHz)

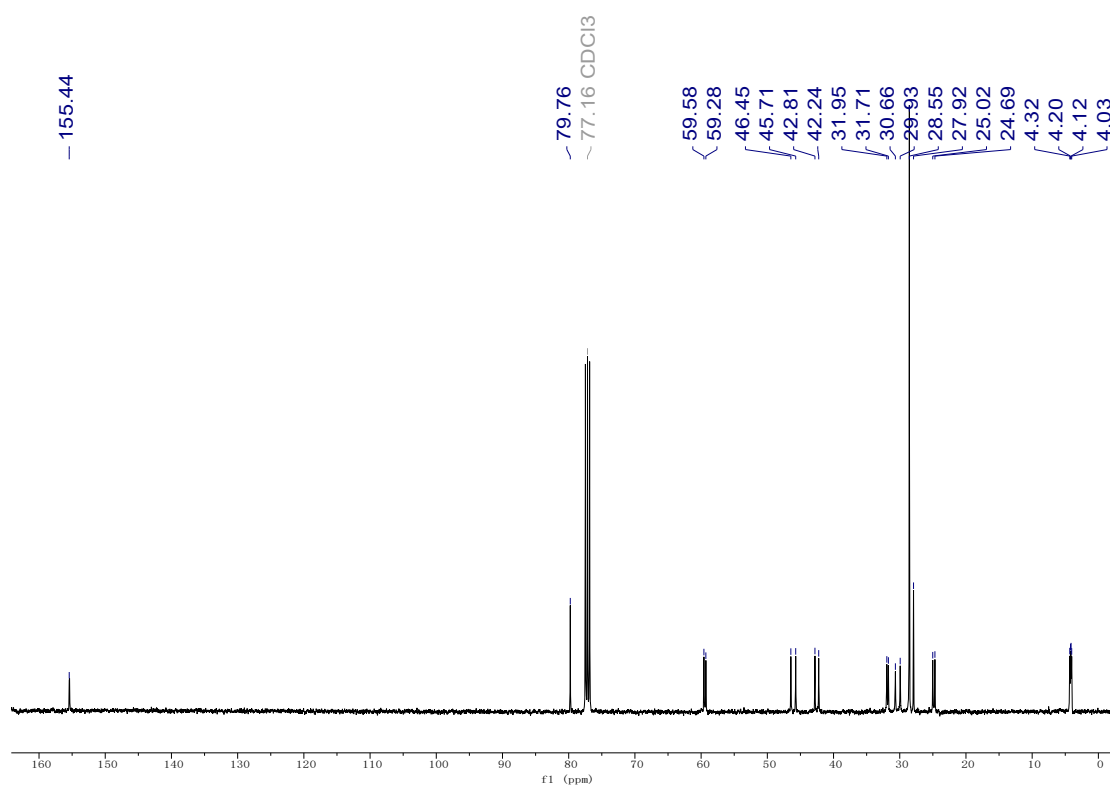

**Figure 15.** The  $^{13}\text{C}$  NMR spectrum of **1d** in chloroform-*d* (100 MHz)

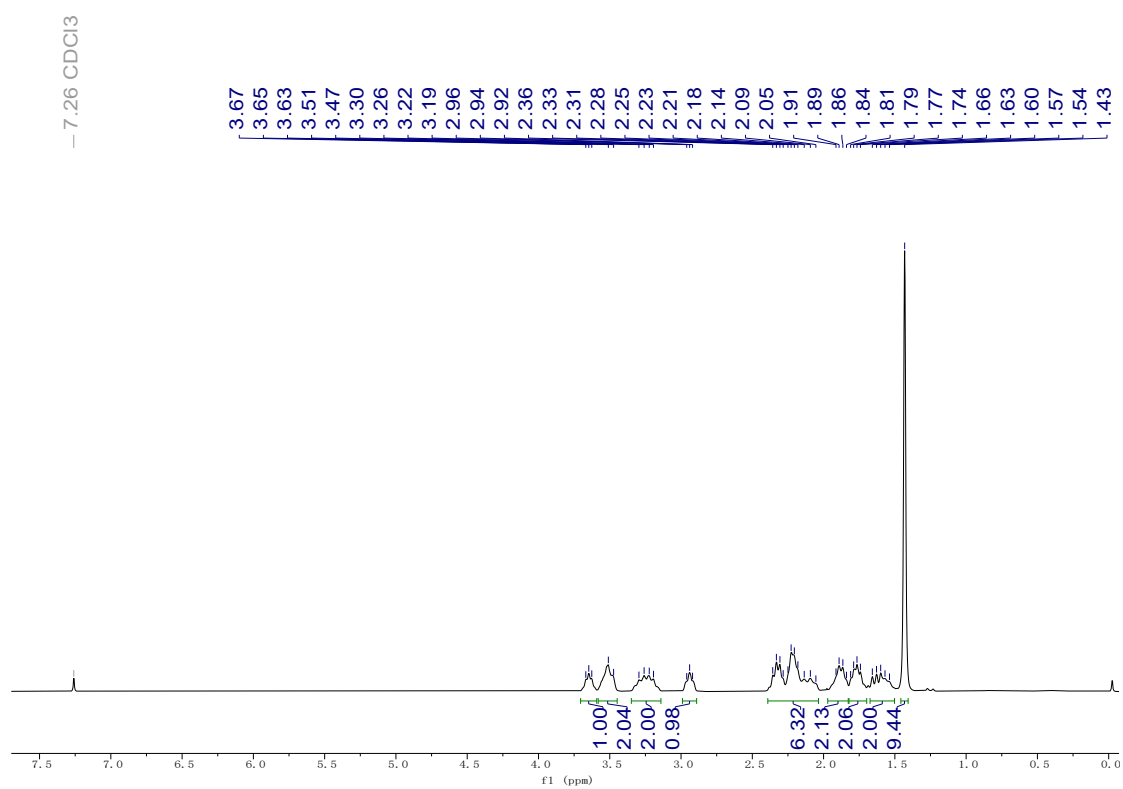

**Figure 16.** The  $^1\text{H}$  NMR spectrum of **1e** in chloroform-*d* (400 MHz)

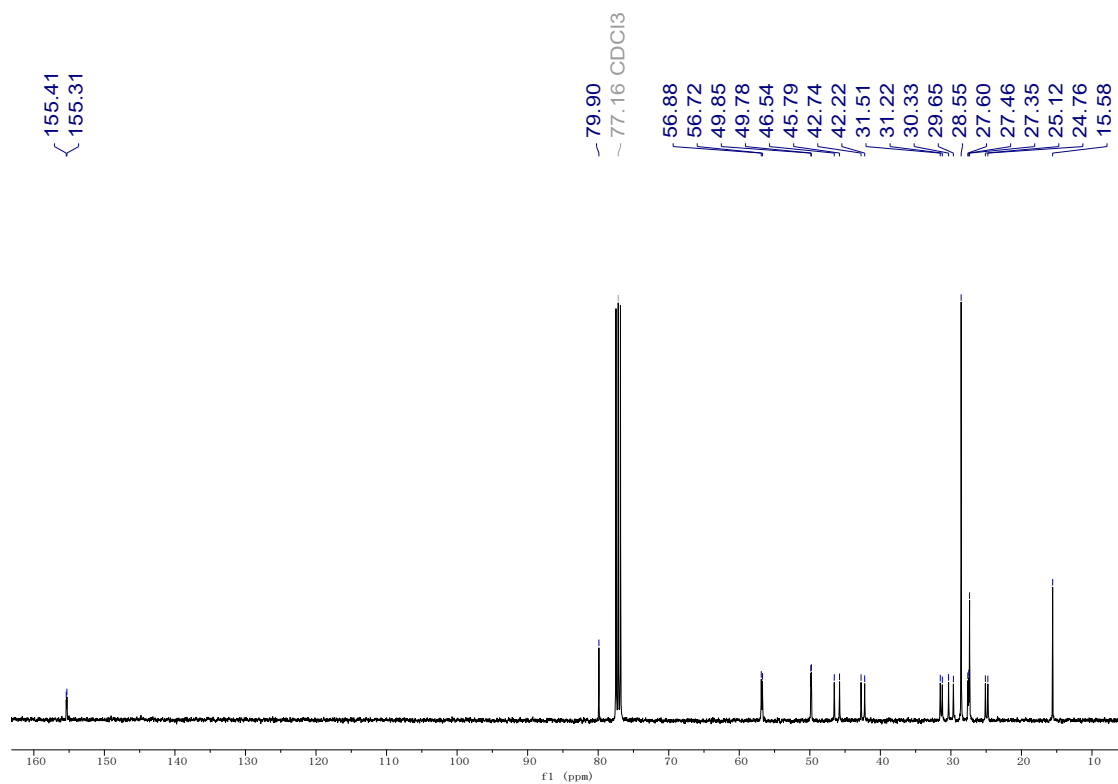

**Figure 17.** The  $^{13}\text{C}$  NMR spectrum of **1e** in chloroform-*d* (100 MHz)

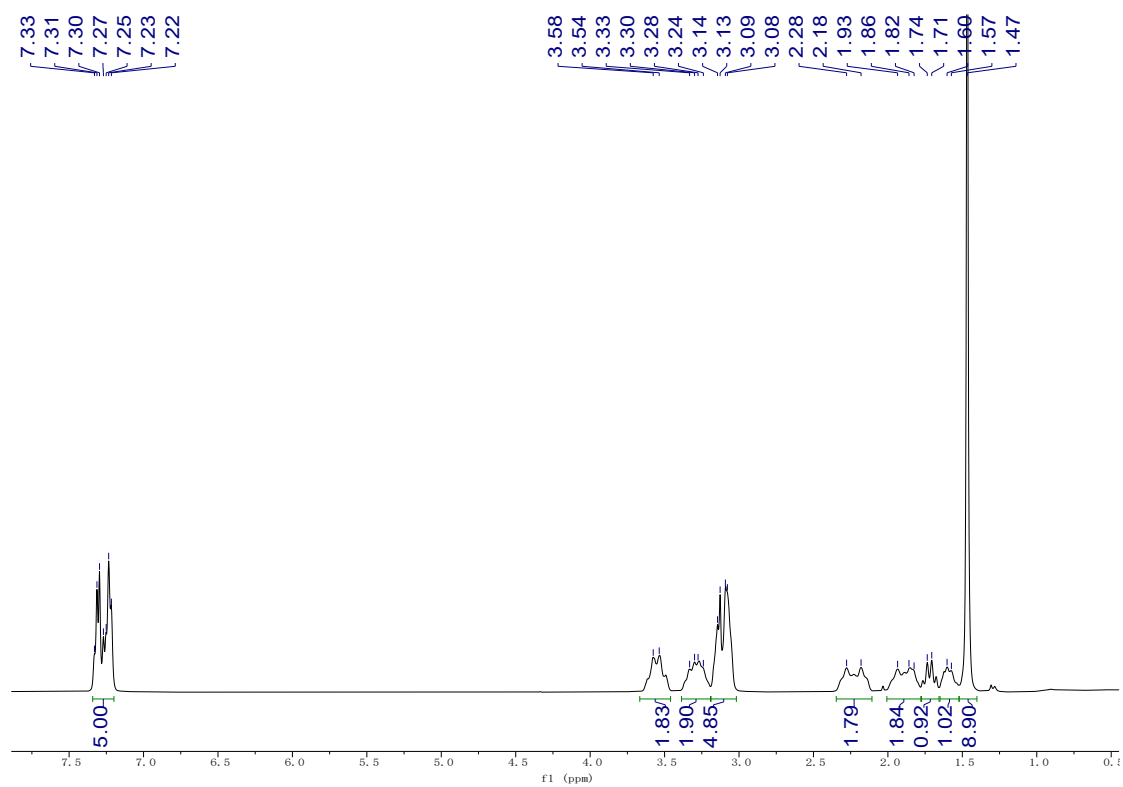

**Figure 18.** The  $^1\text{H}$  NMR spectrum of **1f** in chloroform-*d* (400 MHz)

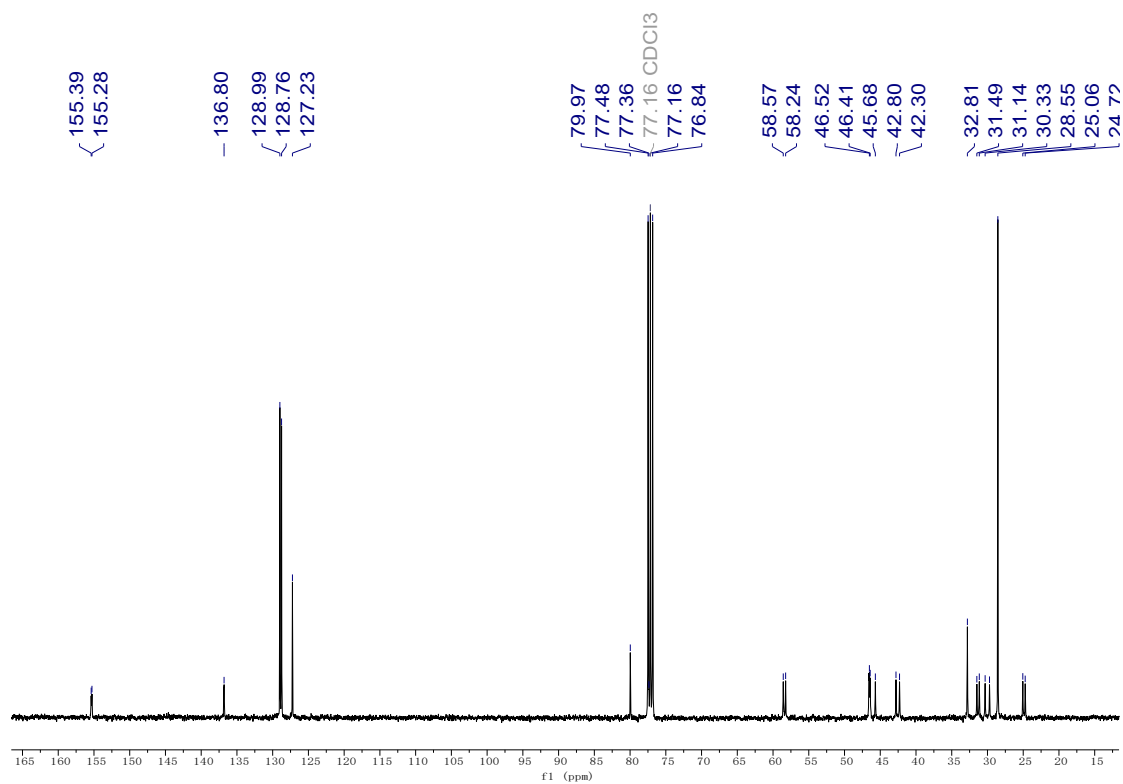

**Figure 19.** The  $^{13}\text{C}$  NMR spectrum of **1f** in chloroform-*d* (100 MHz)

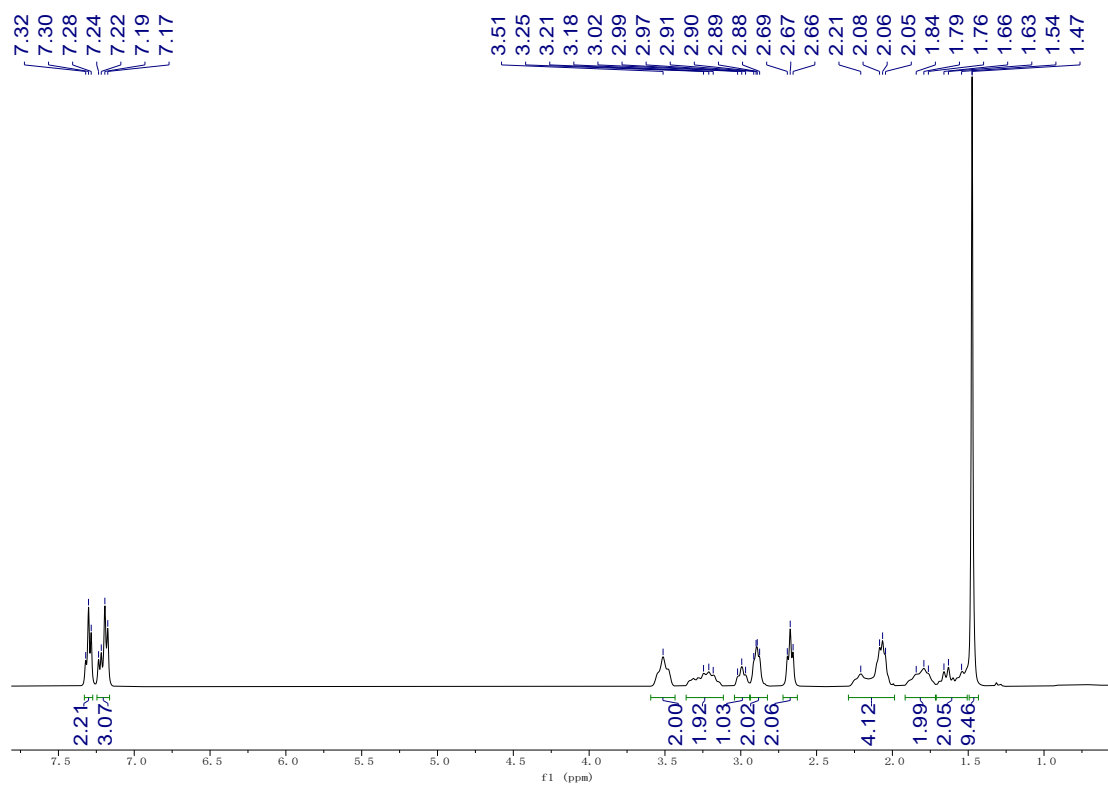

**Figure 20.** The  $^1\text{H}$  NMR spectrum of **1g** in chloroform-*d* (400 MHz)

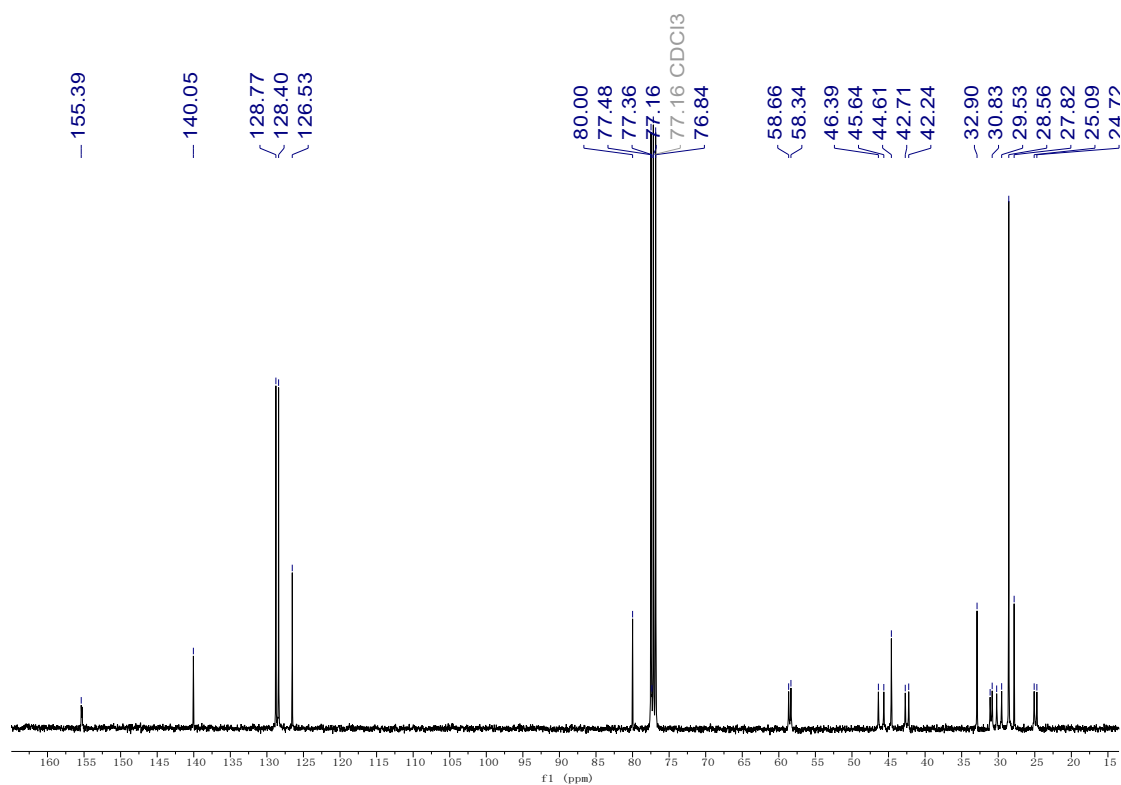

**Figure 21.** The  $^{13}\text{C}$  NMR spectrum of **1g** in chloroform-*d* (100 MHz)

### HR-ESI-MS spectra of amine products



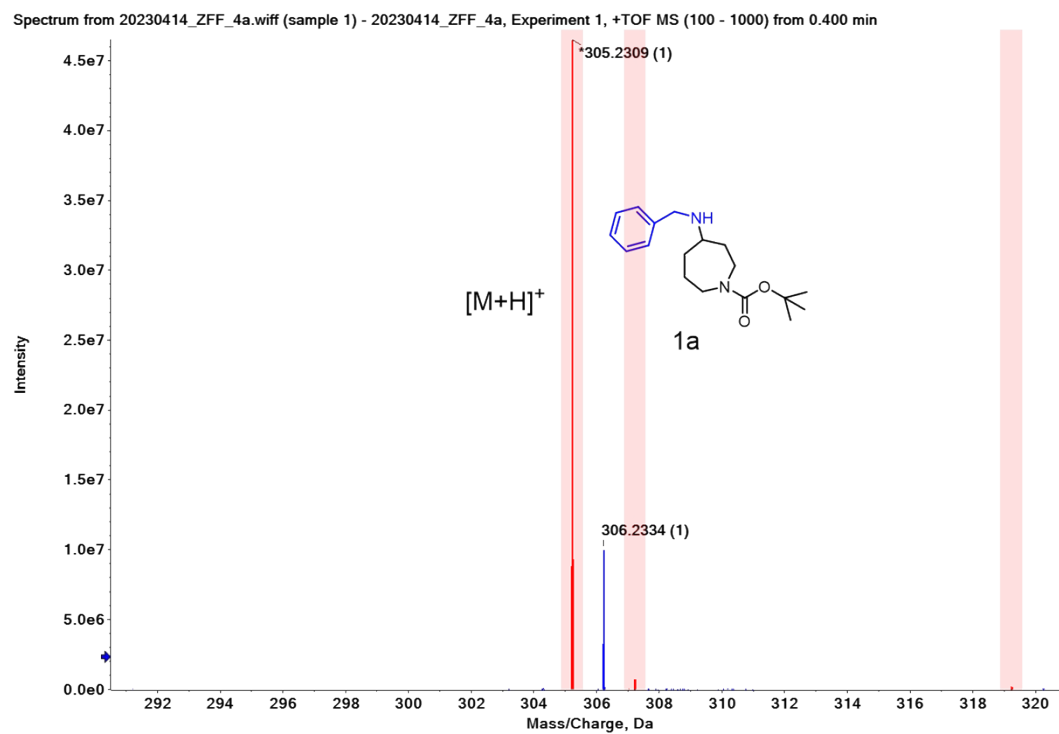

**Figure 22.** The HR-ESI-MS spectrum of **1a**.

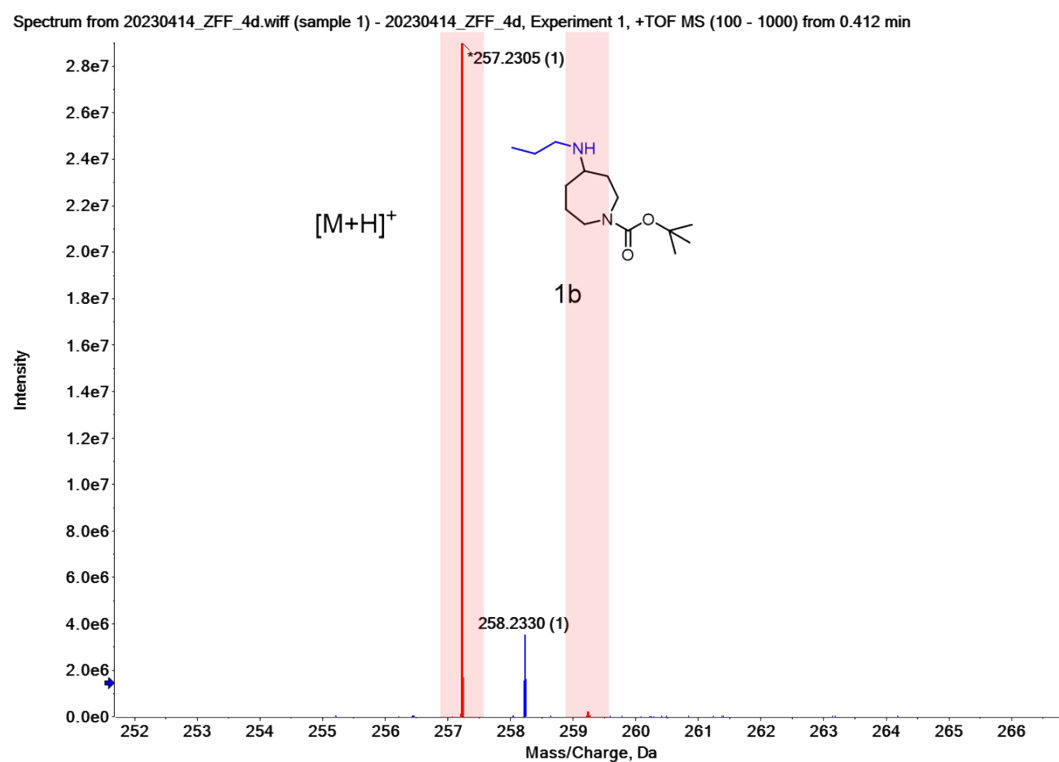

**Figure 23.** The HR-ESI-MS spectrum of **1b**.

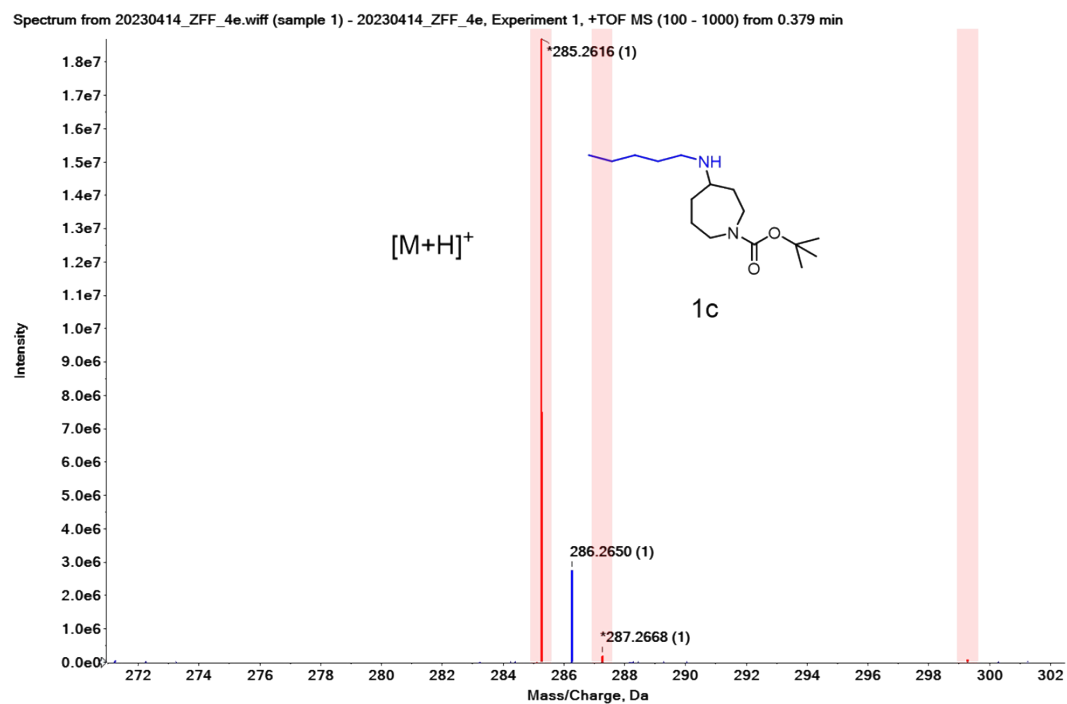

Figure 24. The HR-ESI-MS spectrum of **1c**.

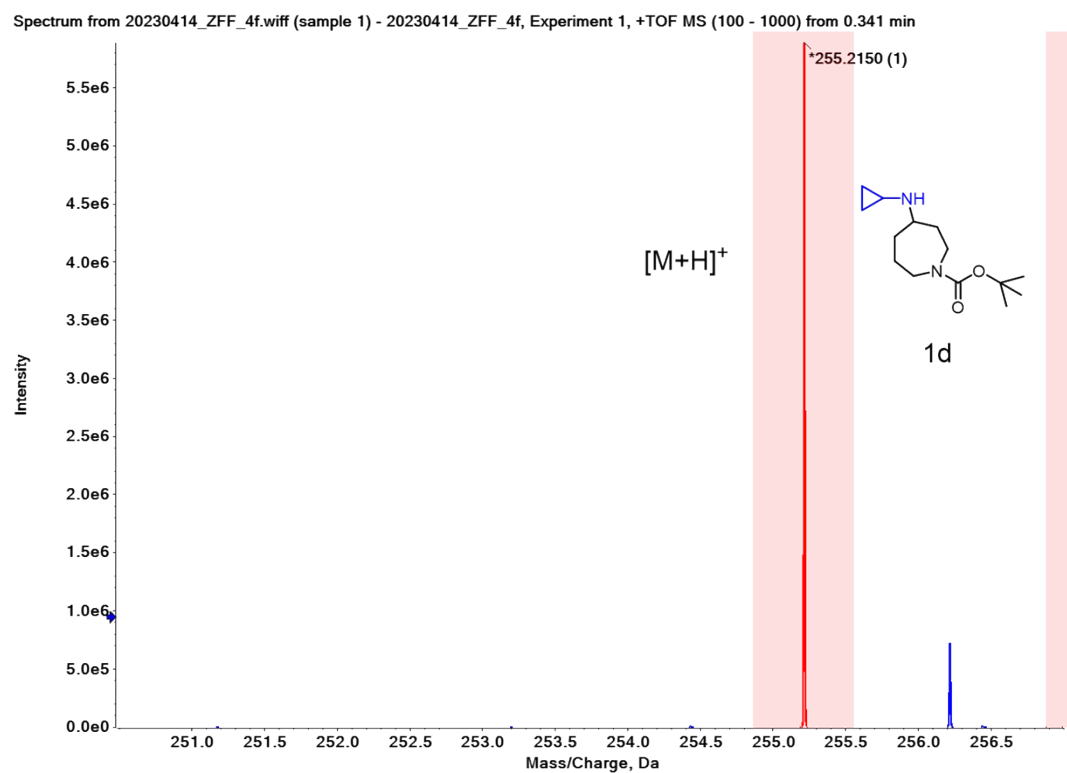

Figure 25. The HR-ESI-MS spectrum of **1d**.

Spectrum from 20230414\_ZFF\_4g.wiff (sample 1) - 20230414\_ZFF\_4g, Experiment 1, +TOF MS (100 - 1000) from 0.325 min

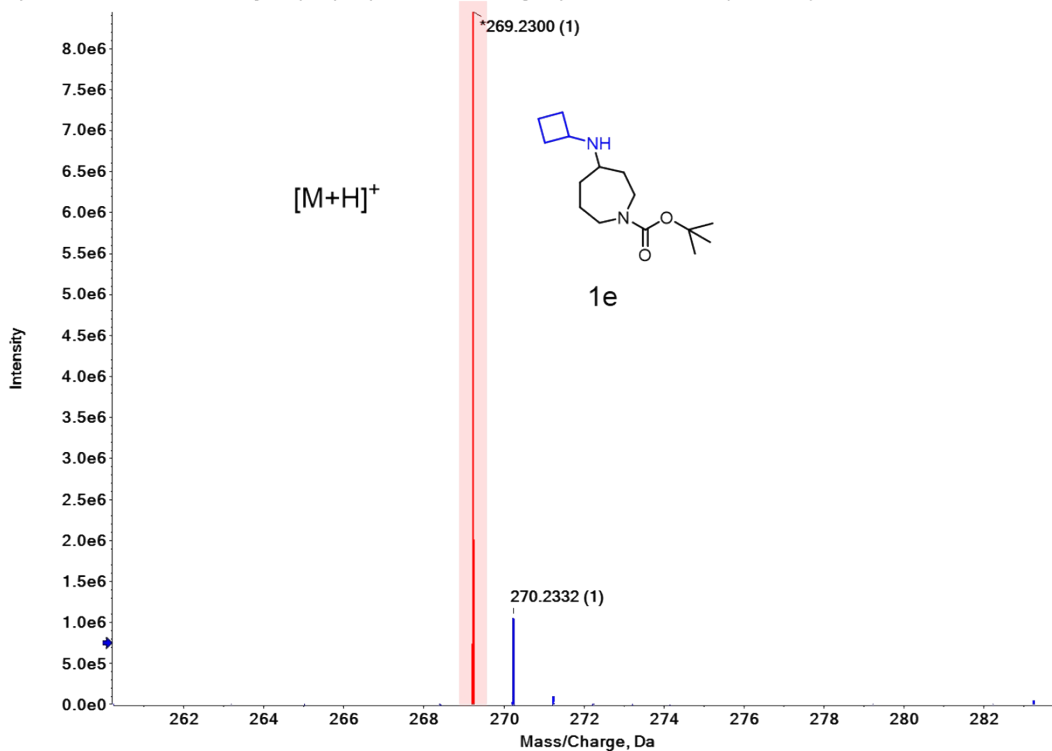

Figure 26. The HR-ESI-MS spectrum of 1e.

Spectrum from 20230414\_ZFF\_4k.wiff (sample 1) - 20230414\_ZFF\_4k, Experiment 1, +TOF MS (100 - 1000) from 0.356 min

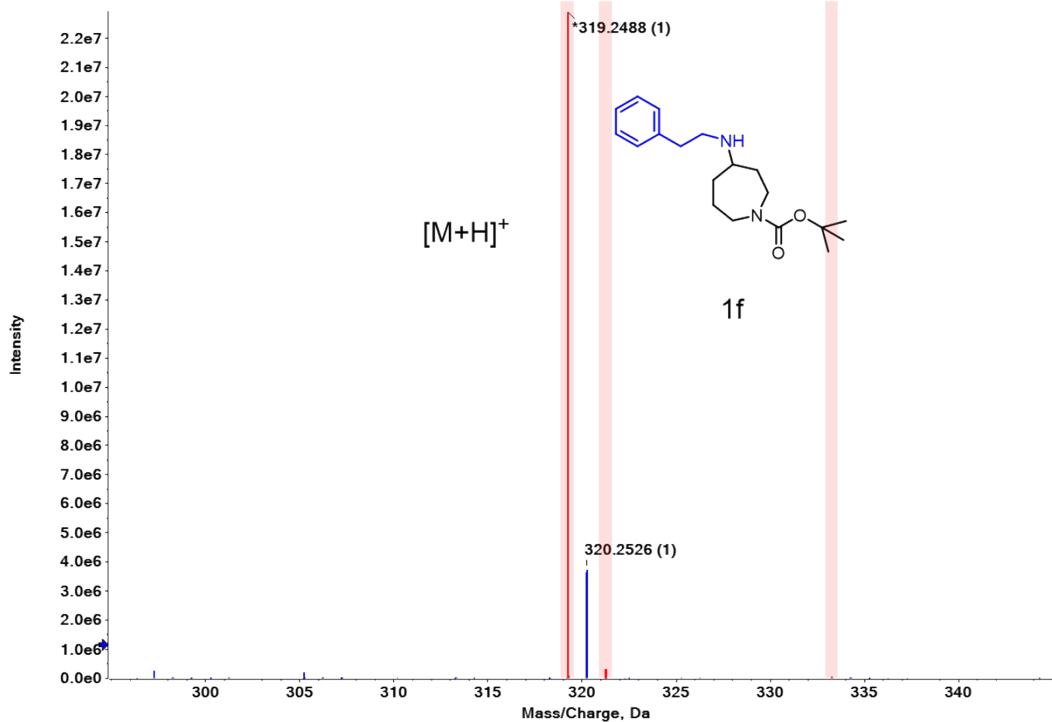

Figure 27. The HR-ESI-MS spectrum of 1f.

Spectrum from 20230414\_ZFF\_4I.wiff (sample 1) - 20230414\_ZFF\_4I, Experiment 1, +TOF MS (100 - 1000) from 0.356 min

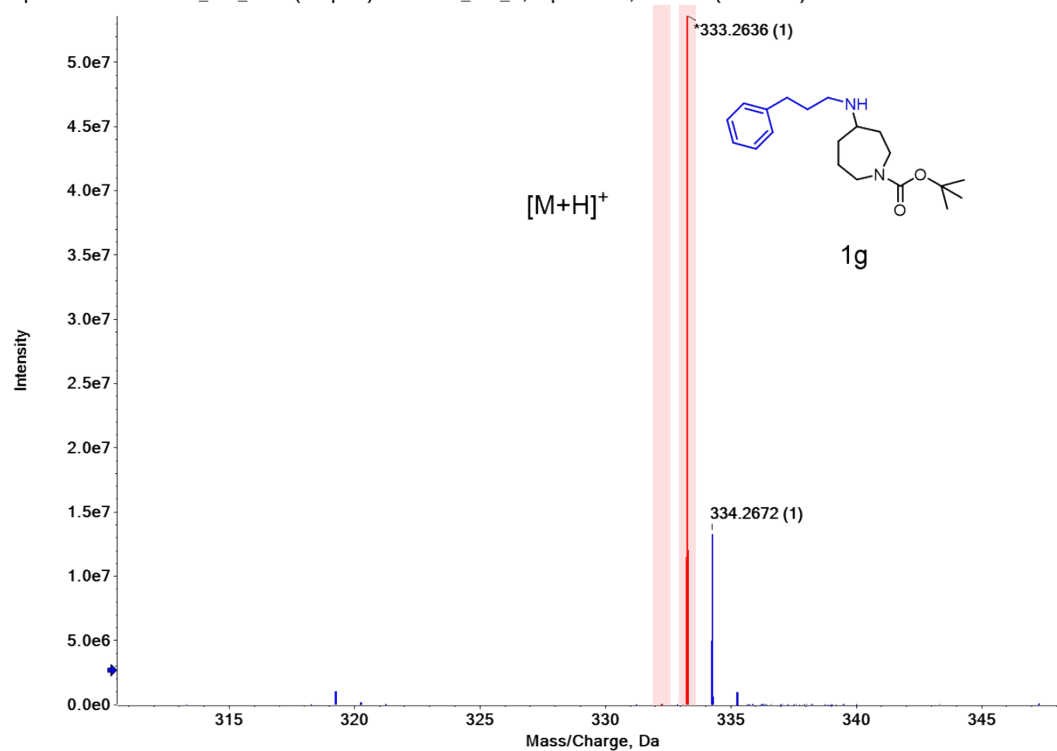

**Figure 28.** The HR-ESI-MS spectrum of **1g**.
